# Supplementary material for: Placebo effects in low back pain: A systematic review and meta‐analysis of the literature
Source: PubMed Central journal article supplement (PMC8518410; doi:10.1002/ejp.1811), 2021-06-21

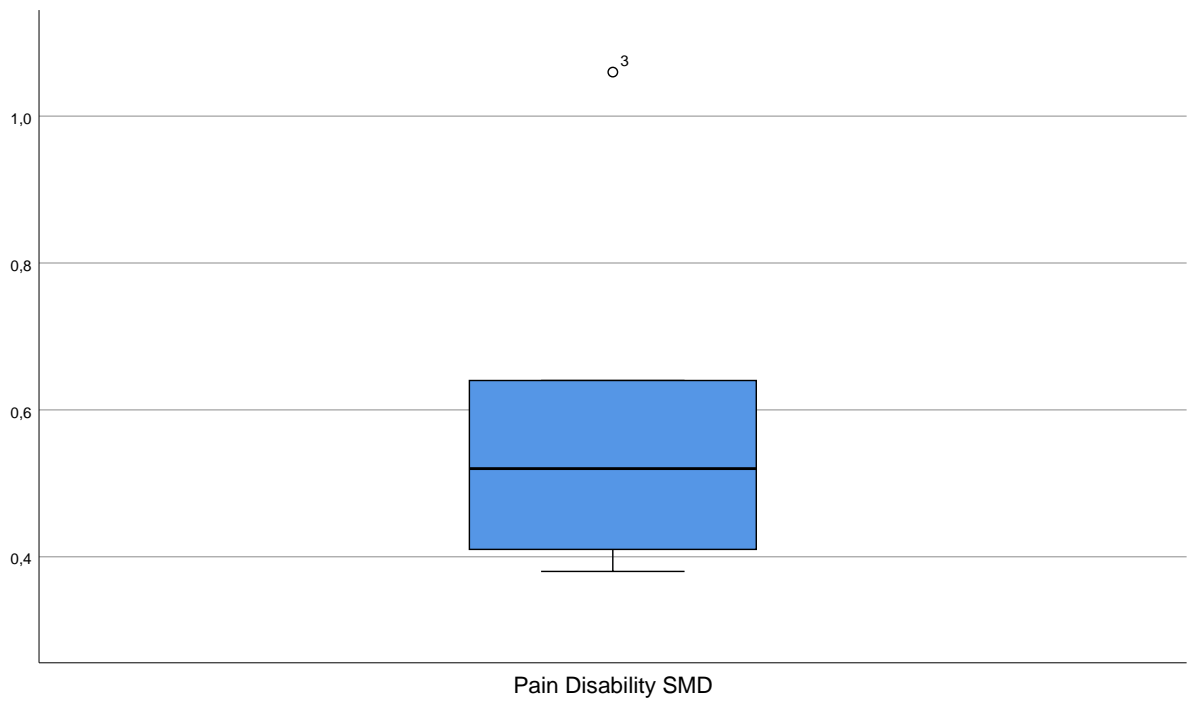

Supplement: EJP-25-1876-s003.pdf [file EJP-25-1876-s003.pdf]
